# Supplementary material for: Beneficial effects of dietary supplementation with green tea catechins and cocoa flavanols on aging-related regressive changes in the mouse neuromuscular system
Source: publisher site journal article supplement (doi:10.18632/aging.203336), 2021-07-28
Supplement: Supplementary file [file aging-v13i14-203336-supplementary-material-SD2.pdf]

## SUPPLEMENTARY TABLE

**Supplementary Table 1. Results from motor and sensory nerve conduction tests performed in old mice (24 months) fed with a standard (AIN-93M) diet (control), or the AIN-93M diet supplemented with either GTE- or cocoa flavanols.**

| Parameter          | Old control (n=7) | Old GTE (n=5) | Old cocoa (n=5) |
|--------------------|-------------------|---------------|-----------------|
| TA Lat peak (ms)   | 1.55 ± 0.08       | 1.52 ± 0.03   | 1.48 ± 0.02     |
| TA CMAP (mV)       | 50.5 ± 2.7        | 47.0 ± 4.9    | 53.4 ± 4.7      |
| SMUA (mV)          | 1.20 ± 0.08       | 1.01 ± 0.04   | 1.18 ± 0.12     |
| MUNE               | 40.8 ± 1.5        | 44.5 ± 2.6    | 44.9 ± 0.7      |
| PL Lat peak (ms)   | 2.44 ± 0.19       | 2.64 ± 0.07   | 2.34 ± 0.10     |
| PL CMAP (mV)       | 4.60 ± 0.55       | 4.22 ± 0.75   | 4.80 ± 0.58     |
| PL H wave Lat (ms) | 6.92 ± 0.40       | 7.51 ± 0.36   | 6.52 ± 0.21     |
| PL H/M ratio (%)   | 32.1 ± 3.6        | 28.0 ± 8.8    | 17.8 ± 3.3      |
| DgN Lat (ms)       | 1.39 ± 0.06       | 1.29 ± 0.07   | 1.32 ± 0.05     |
| DgN CNAP (μV)      | 29.1 ± 1.8        | 31.0 ± 5.4    | 32.0 ± 4.7      |
| Weight (g)         | 29.7 ± 0.7        | 25.1 ± 1.3    | 27.8 ± 0.9      |

TA, tibialis anterior muscle; PL, plantar interosseus muscle; DgN, 4th digital nerve; Lat, latency at the peak of the wave; CMAP, compound muscle action potential; CNAP, compound nerve action potential; MUNE, motor unit number estimation; SMUA, single motor unit amplitude.

Statistical comparisons between groups were performed with one-way ANOVA (Bonferroni's *post hoc* test); no significant differences were found.
